# Supplementary material
Source: PubMed Central journal article supplement (PMC2738574)
Supplement: blood-2009-02-203216_1.pdf [file blood-2009-02-203216_1.pdf]

|                              | +/+           | +/-           | -/-                           |
|------------------------------|---------------|---------------|-------------------------------|
| RBC ( $10^6$ /L)             | 10.3 +/- 0.2  | 10.1 +/- 0.8  | 3.7 +/- 0.2*                  |
| Hematocrit (%)               | 52.8 +/- 1.7  | 51.5 +/- 1.5  | 27.0 +/- 4.6*                 |
| Hemoglobin (g/dL)            | 15.9 +/- 0.2  | 15.9 +/- 0.3  | 6.5 +/- 0.3*                  |
| Mean Corpuscular Volume (fL) | 51.1 +/- 0.3  | 51.0 +/- 0.4  | 64.8 +/- 1.1*                 |
| Reticulocyte (%)             | 2.2 +/- 1.2   | 6.3 +/- 2.0*  | 95.2 +/- 2.9*                 |
| RBC life span (days)         | 60            | 57            | 2                             |
| Nucleated RBC ( $10^3$ /L)   | 0             | 0             | 69 +/- 13*                    |
| Platelet                     | 1051 +/- 105  | 851 +/- 72    | 620 +/- 50                    |
| Band 3 mRNA (Bone Marrow)    | 1             | 0.67 +/- 0.29 | 0.08 +/- 0.007 <sup>++</sup>  |
| Band 3 mRNA (Spleen)         | 0.05 +/- 0.02 | 0.02 +/- 0.01 | 0.008 +/- 0.004 <sup>++</sup> |

\*  $p < 0.001$     <sup>++</sup>  $p < 0.01$
